# Supplementary material
Source: Springer Nature journal article supplement (http://www.springermedizin.de/resource/supplementary/12887_2011_526_MOESM2_ESM.pdf/9475094)

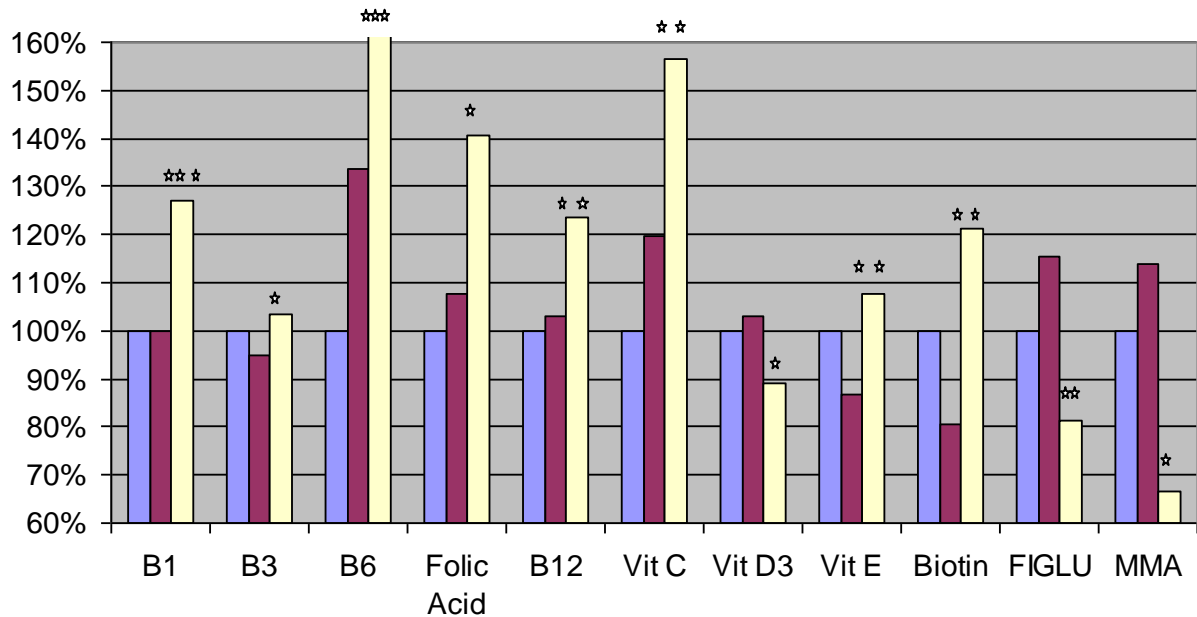

Control Pre-Treatment Post-Treatment

Supplement: MOESM2 [file 9475094]
